# Supplementary material
Source: publisher figshare collection journal article supplement (https://acs.figshare.com/ndownloader/files/4729348)
Supplement: Supplementary file 1 [file 4729348]

Yu-Bin Dong,* Qiang Zhang, Li-Li Liu, Jian-Ping Ma, Bo Tang* and Ru-Qi Huang
College of Chemistry, Chemical Engineering and Materials Science, Engineering Research Center of Pesticide and Medicine Intermediate Clean Production, Ministry of Education, Shandong Normal University, Jinan 250014, P. R. China. Email: yubindong@sdnu.edu.cn 
 
data_2''
  
_audit_creation_method            SHELXL-97 
_chemical_name_systematic 
; 
 ? 
; 
_chemical_name_common             ? 
_chemical_melting_point           ? 
_chemical_formula_moiety          ? 
_chemical_formula_sum 
 'C49 H44 Cl2 Cu2 N8 O6' 
_chemical_formula_weight          1038.90 
  
loop_ 
 _atom_type_symbol 
 _atom_type_description 
 _atom_type_scat_dispersion_real 
 _atom_type_scat_dispersion_imag 
 _atom_type_scat_source 
 'C'  'C'   0.0033   0.0016 
 'International Tables Vol C Tables 4.2.6.8 and 6.1.1.4' 
 'H'  'H'   0.0000   0.0000 
 'International Tables Vol C Tables 4.2.6.8 and 6.1.1.4' 
 'N'  'N'   0.0061   0.0033 
 'International Tables Vol C Tables 4.2.6.8 and 6.1.1.4' 
 'O'  'O'   0.0106   0.0060 
 'International Tables Vol C Tables 4.2.6.8 and 6.1.1.4' 
 'Cu'  'Cu'   0.3201   1.2651 
 'International Tables Vol C Tables 4.2.6.8 and 6.1.1.4' 
 'Cl'  'Cl'   0.1484   0.1585 
 'International Tables Vol C Tables 4.2.6.8 and 6.1.1.4' 
  
_symmetry_cell_setting            Monoclinic 
_symmetry_space_group_name_H-M    P2(1)/c 
  
loop_ 
 _symmetry_equiv_pos_as_xyz 
 'x, y, z' 
 '-x, y+1/2, -z+1/2' 
 '-x, -y, -z' 
 'x, -y-1/2, z-1/2' 
  
_cell_length_a                    12.890(2) 
_cell_length_b                    14.216(3) 
_cell_length_c                    14.559(3) 
_cell_angle_alpha                 90.00 
_cell_angle_beta                  111.240(2) 
_cell_angle_gamma                 90.00 
_cell_volume                      2486.8(8) 
_cell_formula_units_Z             2 
_cell_measurement_temperature     298(2) 
_cell_measurement_reflns_used     3217 
_cell_measurement_theta_min       2.863 
_cell_measurement_theta_max       23.055 
  
_exptl_crystal_description        block 
_exptl_crystal_colour             brown 
_exptl_crystal_size_max           0.42 
_exptl_crystal_size_mid           0.33 
_exptl_crystal_size_min           0.19 
_exptl_crystal_density_meas       ?
_exptl_crystal_density_diffrn     1.387 
_exptl_crystal_density_method     'not measured' 
_exptl_crystal_F_000              1068 
_exptl_absorpt_coefficient_mu     1.018 
_exptl_absorpt_correction_type    multi-scan 
_exptl_absorpt_correction_T_min   0.6744 
_exptl_absorpt_correction_T_max   0.8301 
_exptl_absorpt_process_details    sadabs 
  
_exptl_special_details 
; 
 ? 
; 
  
_diffrn_ambient_temperature       298(2) 
_diffrn_radiation_wavelength      0.71073 
_diffrn_radiation_type            MoK\a 
_diffrn_radiation_source          'fine-focus sealed tube' 
_diffrn_radiation_monochromator   graphite 
_diffrn_measurement_device_type   'CCD area detector' 
_diffrn_measurement_method        'phi and omega scans' 
_diffrn_detector_area_resol_mean  ? 
_diffrn_standards_number          ? 
_diffrn_standards_interval_count  ? 
_diffrn_standards_interval_time   ? 
_diffrn_standards_decay_%         ? 
_diffrn_reflns_number             12849 
_diffrn_reflns_av_R_equivalents   0.0290 
_diffrn_reflns_av_sigmaI/netI     0.0368 
_diffrn_reflns_limit_h_min        -15 
_diffrn_reflns_limit_h_max        15 
_diffrn_reflns_limit_k_min        -9 
_diffrn_reflns_limit_k_max        17 
_diffrn_reflns_limit_l_min        -17 
_diffrn_reflns_limit_l_max        16 
_diffrn_reflns_theta_min          2.07 
_diffrn_reflns_theta_max          25.50 
_reflns_number_total              4641 
_reflns_number_gt                 3454 
_reflns_threshold_expression      >2sigma(I) 
  
_computing_data_collection        'Bruker SMART' 
_computing_cell_refinement        'Bruker SMART' 
_computing_data_reduction         'Bruker SAINT' 
_computing_structure_solution     'SHELXS-97 (Sheldrick, 1990)' 
_computing_structure_refinement   'SHELXL-97 (Sheldrick, 1997)' 
_computing_molecular_graphics     'Bruker SHELXTL' 
_computing_publication_material   'Bruker SHELXTL' 
  
_refine_special_details 
; 
 Refinement of F^2^ against ALL reflections.  The weighted R-factor wR and 
 goodness of fit S are based on F^2^, conventional R-factors R are based 
 on F, with F set to zero for negative F^2^. The threshold expression of 
 F^2^ > 2sigma(F^2^) is used only for calculating R-factors(gt) etc. and is 
 not relevant to the choice of reflections for refinement.  R-factors based 
 on F^2^ are statistically about twice as large as those based on F, and R- 
 factors based on ALL data will be even larger. 
; 
  
_refine_ls_structure_factor_coef  Fsqd 
_refine_ls_matrix_type            full 
_refine_ls_weighting_scheme       calc 
_refine_ls_weighting_details 
 'calc w=1/[\s^2^(Fo^2^)+(0.1133P)^2^+1.9295P] where P=(Fo^2^+2Fc^2^)/3' 
_atom_sites_solution_primary      direct 
_atom_sites_solution_secondary    difmap 
_atom_sites_solution_hydrogens    geom 
_refine_ls_hydrogen_treatment     constr
_refine_ls_extinction_method      none 
_refine_ls_extinction_coef        ? 
_refine_ls_number_reflns          4641 
_refine_ls_number_parameters      306 
_refine_ls_number_restraints      0 
_refine_ls_R_factor_all           0.0879 
_refine_ls_R_factor_gt            0.0658 
_refine_ls_wR_factor_ref          0.2000 
_refine_ls_wR_factor_gt           0.1881 
_refine_ls_goodness_of_fit_ref    1.049 
_refine_ls_restrained_S_all       1.049 
_refine_ls_shift/su_max           0.001 
_refine_ls_shift/su_mean          0.000 
  
loop_ 
 _atom_site_label 
 _atom_site_type_symbol 
 _atom_site_fract_x 
 _atom_site_fract_y 
 _atom_site_fract_z 
 _atom_site_U_iso_or_equiv 
 _atom_site_adp_type 
 _atom_site_occupancy 
 _atom_site_symmetry_multiplicity 
 _atom_site_calc_flag 
 _atom_site_refinement_flags 
 _atom_site_disorder_assembly 
 _atom_site_disorder_group 
Cu1 Cu 0.22072(4) -0.04038(4) 1.05883(4) 0.0529(2) Uani 1 1 d . . . 
N1 N 0.1652(3) 0.0425(3) 0.5605(3) 0.0620(11) Uani 1 1 d . . . 
N2 N 0.2617(4) 0.0593(3) 0.5407(3) 0.0629(11) Uani 1 1 d . . . 
N3 N 0.1493(3) 0.0689(2) 0.9746(3) 0.0467(8) Uani 1 1 d . . . 
N4 N 0.7132(3) 0.1518(2) 0.8593(3) 0.0527(9) Uani 1 1 d . . . 
C1 C 0.5278(15) 0.4479(10) 0.5342(13) 0.474(11) Uiso 0.50 1 d P . . 
C2 C 0.6833(6) 0.3207(4) 0.8180(5) 0.103(2) Uani 1 1 d . . . 
H2A H 0.7247 0.3313 0.7759 0.155 Uiso 1 1 calc R . . 
H2B H 0.6840 0.3768 0.8549 0.155 Uiso 1 1 calc R . . 
H2C H 0.6079 0.3047 0.7786 0.155 Uiso 1 1 calc R . . 
C3 C 0.7360(4) 0.2404(3) 0.8885(4) 0.0660(13) Uani 1 1 d . . . 
C4 C 0.8073(4) 0.2647(4) 0.9842(5) 0.0735(15) Uani 1 1 d . . . 
H4 H 0.8216 0.3284 0.9970 0.088 Uiso 1 1 calc R . . 
C5 C 0.8562(4) 0.2061(4) 1.0580(5) 0.0763(16) Uani 1 1 d . . . 
C6 C 0.9286(5) 0.2403(5) 1.1583(5) 0.103(2) Uani 1 1 d . . . 
H6A H 0.8956 0.2234 1.2054 0.154 Uiso 1 1 calc R . . 
H6B H 0.9357 0.3075 1.1570 0.154 Uiso 1 1 calc R . . 
H6C H 1.0009 0.2120 1.1766 0.154 Uiso 1 1 calc R . . 
C7 C 0.6401(4) 0.1356(3) 0.7609(4) 0.0557(11) Uani 1 1 d . . . 
C8 C 0.6793(5) 0.1324(4) 0.6841(4) 0.0747(15) Uani 1 1 d . . . 
H8 H 0.7546 0.1419 0.6964 0.090 Uiso 1 1 calc R . . 
C9 C 0.6069(5) 0.1151(5) 0.5892(5) 0.0859(18) Uani 1 1 d . . . 
H9 H 0.6340 0.1143 0.5381 0.103 Uiso 1 1 calc R . . 
C10 C 0.4949(5) 0.0989(4) 0.5684(4) 0.0701(14) Uani 1 1 d . . . 
H10 H 0.4469 0.0885 0.5039 0.084 Uiso 1 1 calc R . . 
C11 C 0.4558(4) 0.0983(3) 0.6449(3) 0.0512(10) Uani 1 1 d . . . 
C12 C 0.5284(3) 0.1182(3) 0.7407(3) 0.0505(10) Uani 1 1 d . . . 
H12 H 0.5011 0.1197 0.7916 0.061 Uiso 1 1 calc R . . 
C13 C 0.3394(4) 0.0777(3) 0.6236(3) 0.0482(10) Uani 1 1 d . . . 
C14 C 0.1919(3) 0.0513(3) 0.6544(3) 0.0468(10) Uani 1 1 d . . . 
C15 C 0.1240(3) 0.0398(3) 0.7144(3) 0.0500(10) Uani 1 1 d . . . 
C16 C 0.0143(4) 0.0080(3) 0.6702(3) 0.0561(11) Uani 1 1 d . . . 
H16 H -0.0147 -0.0057 0.6032 0.067 Uiso 1 1 calc R . . 
C17 C -0.0494(4) -0.0028(4) 0.7259(4) 0.0669(13) Uani 1 1 d . . . 
H17 H -0.1218 -0.0252 0.6972 0.080 Uiso 1 1 calc R . . 
C18 C -0.0070(4) 0.0196(4) 0.8255(4) 0.0630(13) Uani 1 1 d . . . 
H18 H -0.0517 0.0123 0.8628 0.076 Uiso 1 1 calc R . . 
C19 C 0.1006(4) 0.0526(3) 0.8700(3) 0.0526(11) Uani 1 1 d . . . 
C20 C 0.1659(3) 0.0632(3) 0.8134(3) 0.0474(10) Uani 1 1 d . . . 
H20 H 0.2381 0.0860 0.8419 0.057 Uiso 1 1 calc R . . 
C21 C 0.0828(5) 0.2311(4) 0.9368(4) 0.0847(17) Uani 1 1 d . . . 
H21A H 0.1348 0.2685 0.9193 0.127 Uiso 1 1 calc R . . 
H21B H 0.0451 0.2701 0.9686 0.127 Uiso 1 1 calc R . . 
H21C H 0.0294 0.2039 0.8785 0.127 Uiso 1 1 calc R . . 
C22 C 0.1441(4) 0.1541(3) 1.0060(3) 0.0562(11) Uani 1 1 d . . . 
C23 C 0.1983(4) 0.1799(3) 1.1061(3) 0.0622(12) Uani 1 1 d . . . 
H23 H 0.1867 0.2410 1.1231 0.075 Uiso 1 1 calc R . . 
C24 C 0.2650(4) 0.1249(3) 1.1792(3) 0.0598(12) Uani 1 1 d . . . 
C25 C 0.3219(6) 0.1635(4) 1.2813(4) 0.0905(19) Uani 1 1 d . . . 
H25A H 0.3085 0.1226 1.3282 0.136 Uiso 1 1 calc R . . 
H25B H 0.2930 0.2250 1.2854 0.136 Uiso 1 1 calc R . . 
H25C H 0.4005 0.1677 1.2954 0.136 Uiso 1 1 calc R . . 
Cl1 Cl 0.5278(15) 0.4479(10) 0.5342(13) 0.474(11) Uiso 0.50 1 d P . . 
Cl2 Cl 0.4662(7) 0.3438(5) 0.5005(6) 0.215(3) Uani 0.50 1 d P . . 
O1 O 0.3018(2) 0.0748(2) 0.70022(19) 0.0466(7) Uani 1 1 d . . . 
O2 O 0.2849(3) 0.0378(2) 1.1707(3) 0.0741(10) Uani 1 1 d . . . 
O3 O 0.8463(4) 0.1170(3) 1.0516(3) 0.1113(17) Uani 1 1 d . . . 
  
loop_ 
 _atom_site_aniso_label 
 _atom_site_aniso_U_11 
 _atom_site_aniso_U_22 
 _atom_site_aniso_U_33 
 _atom_site_aniso_U_23 
 _atom_site_aniso_U_13 
 _atom_site_aniso_U_12 
Cu1 0.0520(4) 0.0455(4) 0.0564(4) -0.0113(2) 0.0139(3) -0.0050(2) 
N1 0.060(2) 0.076(3) 0.038(2) -0.0063(17) 0.0036(18) -0.0052(19) 
N2 0.070(3) 0.082(3) 0.0303(19) -0.0032(17) 0.0104(19) -0.001(2) 
N3 0.0456(18) 0.048(2) 0.046(2) -0.0086(15) 0.0164(16) -0.0027(15) 
N4 0.0454(19) 0.048(2) 0.063(2) -0.0086(17) 0.0175(18) -0.0081(16) 
C2 0.129(6) 0.052(3) 0.119(6) 0.004(3) 0.035(5) -0.002(3) 
C3 0.060(3) 0.049(3) 0.091(4) -0.011(3) 0.030(3) -0.004(2) 
C4 0.069(3) 0.044(3) 0.105(4) -0.022(3) 0.029(3) -0.013(2) 
C5 0.066(3) 0.058(3) 0.093(4) -0.028(3) 0.015(3) 0.000(3) 
C6 0.087(4) 0.094(5) 0.095(5) -0.050(4) -0.006(3) 0.001(3) 
C7 0.061(3) 0.048(3) 0.064(3) 0.002(2) 0.030(2) 0.000(2) 
C8 0.070(3) 0.089(4) 0.077(4) -0.002(3) 0.041(3) -0.007(3) 
C9 0.106(5) 0.100(4) 0.078(4) -0.005(3) 0.065(4) -0.010(4) 
C10 0.084(4) 0.083(4) 0.046(3) -0.001(2) 0.028(3) -0.004(3) 
C11 0.059(3) 0.049(3) 0.046(2) 0.0035(19) 0.020(2) 0.004(2) 
C12 0.055(2) 0.051(2) 0.050(3) 0.0031(19) 0.023(2) 0.0037(19) 
C13 0.061(3) 0.046(2) 0.036(2) 0.0024(17) 0.016(2) 0.007(2) 
C14 0.045(2) 0.049(2) 0.035(2) -0.0058(17) 0.0016(18) 0.0029(17) 
C15 0.044(2) 0.053(3) 0.045(2) -0.0064(18) 0.0060(19) -0.0010(18) 
C16 0.045(2) 0.063(3) 0.045(2) -0.010(2) -0.003(2) -0.001(2) 
C17 0.036(2) 0.075(3) 0.074(3) -0.011(3) 0.002(2) -0.010(2) 
C18 0.043(2) 0.081(3) 0.063(3) -0.009(2) 0.016(2) -0.007(2) 
C19 0.048(2) 0.049(3) 0.057(3) -0.0110(19) 0.015(2) -0.0039(18) 
C20 0.040(2) 0.054(3) 0.042(2) -0.0086(18) 0.0059(18) -0.0052(18) 
C21 0.105(4) 0.068(4) 0.067(3) -0.004(3) 0.014(3) 0.017(3) 
C22 0.064(3) 0.052(3) 0.054(3) -0.005(2) 0.023(2) -0.001(2) 
C23 0.086(3) 0.044(3) 0.053(3) -0.008(2) 0.021(3) 0.002(2) 
C24 0.071(3) 0.056(3) 0.052(3) -0.013(2) 0.020(2) -0.016(2) 
C25 0.123(5) 0.069(4) 0.060(3) -0.010(3) 0.010(3) -0.016(3) 
Cl2 0.234(7) 0.130(5) 0.244(8) 0.055(5) 0.042(6) 0.026(5) 
O1 0.0446(15) 0.0583(17) 0.0304(14) -0.0039(12) 0.0059(12) 0.0016(13) 
O2 0.089(3) 0.050(2) 0.061(2) -0.0092(15) 0.0008(19) -0.0002(17) 
O3 0.152(4) 0.055(2) 0.076(3) -0.022(2) -0.018(3) 0.010(2) 
  
_geom_special_details 
; 
 All esds (except the esd in the dihedral angle between two l.s. planes) 
 are estimated using the full covariance matrix.  The cell esds are taken 
 into account individually in the estimation of esds in distances, angles 
 and torsion angles; correlations between esds in cell parameters are only 
 used when they are defined by crystal symmetry.  An approximate (isotropic) 
 treatment of cell esds is used for estimating esds involving l.s. planes. 
; 
  
loop_ 
 _geom_bond_atom_site_label_1 
 _geom_bond_atom_site_label_2 
 _geom_bond_distance 
 _geom_bond_site_symmetry_2 
 _geom_bond_publ_flag 
Cu1 O3 1.874(4) 3_657 ? 
Cu1 O2 1.896(3) . ? 
Cu1 N4 1.980(4) 3_657 ? 
Cu1 N3 1.987(4) . ? 
N1 C14 1.290(5) . ? 
N1 N2 1.396(6) . ? 
N2 C13 1.286(5) . ? 
N3 C22 1.306(5) . ? 
N3 C19 1.440(5) . ? 
N4 C3 1.328(6) . ? 
N4 C7 1.420(6) . ? 
N4 Cu1 1.980(4) 3_657 ? 
C1 Cl2 1.668(16) . ? 
C1 Cl1 1.78(3) 3_666 ? 
C2 C3 1.521(8) . ? 
C2 H2A 0.9600 . ? 
C2 H2B 0.9600 . ? 
C2 H2C 0.9600 . ? 
C3 C4 1.405(8) . ? 
C4 C5 1.325(8) . ? 
C4 H4 0.9300 . ? 
C5 O3 1.273(7) . ? 
C5 C6 1.501(7) . ? 
C6 H6A 0.9600 . ? 
C6 H6B 0.9600 . ? 
C6 H6C 0.9600 . ? 
C7 C12 1.383(6) . ? 
C7 C8 1.386(7) . ? 
C8 C9 1.380(8) . ? 
C8 H8 0.9300 . ? 
C9 C10 1.382(8) . ? 
C9 H9 0.9300 . ? 
C10 C11 1.379(6) . ? 
C10 H10 0.9300 . ? 
C11 C12 1.398(6) . ? 
C11 C13 1.448(6) . ? 
C12 H12 0.9300 . ? 
C13 O1 1.369(5) . ? 
C14 O1 1.370(5) . ? 
C14 C15 1.452(6) . ? 
C15 C20 1.385(6) . ? 
C15 C16 1.399(6) . ? 
C16 C17 1.355(7) . ? 
C16 H16 0.9300 . ? 
C17 C18 1.389(7) . ? 
C17 H17 0.9300 . ? 
C18 C19 1.382(6) . ? 
C18 H18 0.9300 . ? 
C19 C20 1.383(6) . ? 
C20 H20 0.9300 . ? 
C21 C22 1.504(7) . ? 
C21 H21A 0.9600 . ? 
C21 H21B 0.9600 . ? 
C21 H21C 0.9600 . ? 
C22 C23 1.417(6) . ? 
C23 C24 1.349(7) . ? 
C23 H23 0.9300 . ? 
C24 O2 1.280(6) . ? 
C24 C25 1.503(7) . ? 
C25 H25A 0.9600 . ? 
C25 H25B 0.9600 . ? 
C25 H25C 0.9600 . ? 
O3 Cu1 1.874(4) 3_657 ? 
  
loop_ 
 _geom_angle_atom_site_label_1 
 _geom_angle_atom_site_label_2 
 _geom_angle_atom_site_label_3 
 _geom_angle 
 _geom_angle_site_symmetry_1 
 _geom_angle_site_symmetry_3 
 _geom_angle_publ_flag 
O3 Cu1 O2 178.5(2) 3_657 . ? 
O3 Cu1 N4 90.89(16) 3_657 3_657 ? 
O2 Cu1 N4 89.62(15) . 3_657 ? 
O3 Cu1 N3 87.60(16) 3_657 . ? 
O2 Cu1 N3 91.87(14) . . ? 
N4 Cu1 N3 177.94(14) 3_657 . ? 
C14 N1 N2 106.7(4) . . ? 
C13 N2 N1 106.9(4) . . ? 
C22 N3 C19 117.5(4) . . ? 
C22 N3 Cu1 125.5(3) . . ? 
C19 N3 Cu1 117.0(3) . . ? 
C3 N4 C7 117.8(4) . . ? 
C3 N4 Cu1 124.7(4) . 3_657 ? 
C7 N4 Cu1 117.4(3) . 3_657 ? 
Cl2 C1 Cl1 121.4(16) . 3_666 ? 
Cl2 C1 C1 121.4(16) . 3_666 ? 
Cl1 C1 C1 0.0(18) 3_666 3_666 ? 
C3 C2 H2A 109.5 . . ? 
C3 C2 H2B 109.5 . . ? 
H2A C2 H2B 109.5 . . ? 
C3 C2 H2C 109.5 . . ? 
H2A C2 H2C 109.5 . . ? 
H2B C2 H2C 109.5 . . ? 
N4 C3 C4 122.6(5) . . ? 
N4 C3 C2 120.2(5) . . ? 
C4 C3 C2 117.2(5) . . ? 
C5 C4 C3 126.7(5) . . ? 
C5 C4 H4 116.6 . . ? 
C3 C4 H4 116.6 . . ? 
O3 C5 C4 124.1(5) . . ? 
O3 C5 C6 113.8(6) . . ? 
C4 C5 C6 122.1(5) . . ? 
C5 C6 H6A 109.5 . . ? 
C5 C6 H6B 109.5 . . ? 
H6A C6 H6B 109.5 . . ? 
C5 C6 H6C 109.5 . . ? 
H6A C6 H6C 109.5 . . ? 
H6B C6 H6C 109.5 . . ? 
C12 C7 C8 118.6(5) . . ? 
C12 C7 N4 120.2(4) . . ? 
C8 C7 N4 121.1(4) . . ? 
C9 C8 C7 120.0(5) . . ? 
C9 C8 H8 120.0 . . ? 
C7 C8 H8 120.0 . . ? 
C8 C9 C10 121.6(5) . . ? 
C8 C9 H9 119.2 . . ? 
C10 C9 H9 119.2 . . ? 
C11 C10 C9 118.8(5) . . ? 
C11 C10 H10 120.6 . . ? 
C9 C10 H10 120.6 . . ? 
C10 C11 C12 119.8(4) . . ? 
C10 C11 C13 118.8(4) . . ? 
C12 C11 C13 121.4(4) . . ? 
C7 C12 C11 121.2(4) . . ? 
C7 C12 H12 119.4 . . ? 
C11 C12 H12 119.4 . . ? 
N2 C13 O1 111.9(4) . . ? 
N2 C13 C11 129.5(4) . . ? 
O1 C13 C11 118.5(4) . . ? 
N1 C14 O1 111.8(4) . . ? 
N1 C14 C15 129.7(4) . . ? 
O1 C14 C15 118.5(3) . . ? 
C20 C15 C16 120.3(4) . . ? 
C20 C15 C14 120.4(4) . . ? 
C16 C15 C14 119.3(4) . . ? 
C17 C16 C15 119.4(4) . . ? 
C17 C16 H16 120.3 . . ? 
C15 C16 H16 120.3 . . ? 
C16 C17 C18 120.3(4) . . ? 
C16 C17 H17 119.8 . . ? 
C18 C17 H17 119.8 . . ? 
C19 C18 C17 121.0(5) . . ? 
C19 C18 H18 119.5 . . ? 
C17 C18 H18 119.5 . . ? 
C18 C19 C20 118.8(4) . . ? 
C18 C19 N3 122.0(4) . . ? 
C20 C19 N3 119.0(4) . . ? 
C19 C20 C15 120.1(4) . . ? 
C19 C20 H20 119.9 . . ? 
C15 C20 H20 119.9 . . ? 
C22 C21 H21A 109.5 . . ? 
C22 C21 H21B 109.5 . . ? 
H21A C21 H21B 109.5 . . ? 
C22 C21 H21C 109.5 . . ? 
H21A C21 H21C 109.5 . . ? 
H21B C21 H21C 109.5 . . ? 
N3 C22 C23 122.2(4) . . ? 
N3 C22 C21 121.5(4) . . ? 
C23 C22 C21 116.3(4) . . ? 
C24 C23 C22 126.6(4) . . ? 
C24 C23 H23 116.7 . . ? 
C22 C23 H23 116.7 . . ? 
O2 C24 C23 125.3(4) . . ? 
O2 C24 C25 114.0(5) . . ? 
C23 C24 C25 120.7(5) . . ? 
C24 C25 H25A 109.5 . . ? 
C24 C25 H25B 109.5 . . ? 
H25A C25 H25B 109.5 . . ? 
C24 C25 H25C 109.5 . . ? 
H25A C25 H25C 109.5 . . ? 
H25B C25 H25C 109.5 . . ? 
C13 O1 C14 102.7(3) . . ? 
C24 O2 Cu1 127.6(3) . . ? 
C5 O3 Cu1 130.0(4) . 3_657 ? 
  
loop_ 
 _geom_torsion_atom_site_label_1 
 _geom_torsion_atom_site_label_2 
 _geom_torsion_atom_site_label_3 
 _geom_torsion_atom_site_label_4 
 _geom_torsion 
 _geom_torsion_site_symmetry_1 
 _geom_torsion_site_symmetry_2 
 _geom_torsion_site_symmetry_3 
 _geom_torsion_site_symmetry_4 
 _geom_torsion_publ_flag 
C14 N1 N2 C13 -0.4(5) . . . . ? 
O3 Cu1 N3 C22 168.9(4) 3_657 . . . ? 
O2 Cu1 N3 C22 -9.8(4) . . . . ? 
N4 Cu1 N3 C22 126(4) 3_657 . . . ? 
O3 Cu1 N3 C19 -12.0(3) 3_657 . . . ? 
O2 Cu1 N3 C19 169.4(3) . . . . ? 
N4 Cu1 N3 C19 -55(4) 3_657 . . . ? 
C7 N4 C3 C4 -179.9(4) . . . . ? 
Cu1 N4 C3 C4 -3.0(7) 3_657 . . . ? 
C7 N4 C3 C2 0.9(7) . . . . ? 
Cu1 N4 C3 C2 177.8(4) 3_657 . . . ? 
N4 C3 C4 C5 -3.4(9) . . . . ? 
C2 C3 C4 C5 175.9(6) . . . . ? 
C3 C4 C5 O3 1.2(10) . . . . ? 
C3 C4 C5 C6 -178.3(5) . . . . ? 
C3 N4 C7 C12 -97.3(5) . . . . ? 
Cu1 N4 C7 C12 85.6(4) 3_657 . . . ? 
C3 N4 C7 C8 85.8(6) . . . . ? 
Cu1 N4 C7 C8 -91.3(5) 3_657 . . . ? 
C12 C7 C8 C9 2.1(8) . . . . ? 
N4 C7 C8 C9 179.0(5) . . . . ? 
C7 C8 C9 C10 -1.3(9) . . . . ? 
C8 C9 C10 C11 -1.2(9) . . . . ? 
C9 C10 C11 C12 2.9(8) . . . . ? 
C9 C10 C11 C13 -177.7(5) . . . . ? 
C8 C7 C12 C11 -0.4(7) . . . . ? 
N4 C7 C12 C11 -177.4(4) . . . . ? 
C10 C11 C12 C7 -2.1(7) . . . . ? 
C13 C11 C12 C7 178.5(4) . . . . ? 
N1 N2 C13 O1 -0.2(5) . . . . ? 
N1 N2 C13 C11 178.6(4) . . . . ? 
C10 C11 C13 N2 -0.4(7) . . . . ? 
C12 C11 C13 N2 179.0(5) . . . . ? 
C10 C11 C13 O1 178.3(4) . . . . ? 
C12 C11 C13 O1 -2.2(6) . . . . ? 
N2 N1 C14 O1 0.9(5) . . . . ? 
N2 N1 C14 C15 -178.9(4) . . . . ? 
N1 C14 C15 C20 -172.6(4) . . . . ? 
O1 C14 C15 C20 7.7(6) . . . . ? 
N1 C14 C15 C16 5.2(7) . . . . ? 
O1 C14 C15 C16 -174.6(4) . . . . ? 
C20 C15 C16 C17 -2.2(7) . . . . ? 
C14 C15 C16 C17 -179.9(4) . . . . ? 
C15 C16 C17 C18 1.5(8) . . . . ? 
C16 C17 C18 C19 -0.4(8) . . . . ? 
C17 C18 C19 C20 0.1(8) . . . . ? 
C17 C18 C19 N3 -174.8(5) . . . . ? 
C22 N3 C19 C18 -94.9(5) . . . . ? 
Cu1 N3 C19 C18 85.9(5) . . . . ? 
C22 N3 C19 C20 90.2(5) . . . . ? 
Cu1 N3 C19 C20 -89.0(4) . . . . ? 
C18 C19 C20 C15 -0.8(7) . . . . ? 
N3 C19 C20 C15 174.2(4) . . . . ? 
C16 C15 C20 C19 1.9(7) . . . . ? 
C14 C15 C20 C19 179.6(4) . . . . ? 
C19 N3 C22 C23 -174.0(4) . . . . ? 
Cu1 N3 C22 C23 5.2(6) . . . . ? 
C19 N3 C22 C21 4.1(6) . . . . ? 
Cu1 N3 C22 C21 -176.7(4) . . . . ? 
N3 C22 C23 C24 3.8(8) . . . . ? 
C21 C22 C23 C24 -174.4(5) . . . . ? 
C22 C23 C24 O2 -4.5(9) . . . . ? 
C22 C23 C24 C25 176.7(5) . . . . ? 
N2 C13 O1 C14 0.7(5) . . . . ? 
C11 C13 O1 C14 -178.2(4) . . . . ? 
N1 C14 O1 C13 -1.0(5) . . . . ? 
C15 C14 O1 C13 178.8(4) . . . . ? 
C23 C24 O2 Cu1 -4.6(8) . . . . ? 
C25 C24 O2 Cu1 174.3(4) . . . . ? 
O3 Cu1 O2 C24 -59(7) 3_657 . . . ? 
N4 Cu1 O2 C24 -169.0(5) 3_657 . . . ? 
N3 Cu1 O2 C24 9.6(5) . . . . ? 
C4 C5 O3 Cu1 8.0(10) . . . 3_657 ? 
C6 C5 O3 Cu1 -172.5(4) . . . 3_657 ? 
  
_diffrn_measured_fraction_theta_max    0.999 
_diffrn_reflns_theta_full              25.50 
_diffrn_measured_fraction_theta_full   0.999 
_refine_diff_density_max    0.816 
_refine_diff_density_min   -0.362 
_refine_diff_density_rms    0.086 
